## Signalling through mechanical inputs – a coordinated process

Huimin Zhang\* and Michel Labouesse\*

\*Authors for correspondence ([zhanghuimin@suda.edu.cn](mailto:zhanghuimin@suda.edu.cn); [lmichel@igbmc.fr](mailto:lmichel@igbmc.fr))

*Journal of Cell Science* 125, 4172

© 2012. Published by The Company of Biologists Ltd

doi: 10.1242/jcs.119776

There was an error published in *J. Cell Sci.* **125**, 3039-3049.

Both authors should have been indicated as being authors for correspondence. The correct information is as shown above.

We apologise for this error.
